# Supplementary material
Source: MDPI journal article supplement (https://www.mdpi.com/2297-8739/10/6/343)
Supplement: s1 [file s1 › separations-2431338-supplementary.pdf]

## Supplementary materials

# Development and Validation of UPLC-MS/MS Method for Quantitative Analysis of 5-Fluorouracil in Aqueous Humor of Rabbits

Mohd Abul Kalam <sup>1,†</sup>, Sulaiman S. Alhudaithi <sup>1,†</sup>, Adel Ali Alhowyan <sup>1</sup>, Muzaffar Iqbal <sup>2</sup>,  
Mohammad Raish <sup>1</sup>, Abdullah K. Alshememry <sup>1</sup>, Musaed Alkholief <sup>1</sup>, Aliyah A. Almomen <sup>2</sup>  
and Aws Alshamsan <sup>1,\*</sup>

- <sup>1</sup> Department of Pharmaceutics, College of Pharmacy, King Saud University, Riyadh 11451, Saudi Arabia; makalam@ksu.edu.sa (M.A.K.); salhudaithi@ksu.edu.sa (S.S.A.); adel-ali@ksu.edu.sa (A.A.A.); mraish@ksu.edu.sa (M.R.); aalshememry@ksu.edu.sa (A.K.A.); malkholief@ksu.edu.sa (M.A.)  
<sup>2</sup> Department of Pharmaceutical Chemistry, College of Pharmacy, King Saud University, Riyadh 11451, Saudi Arabia; muziqbal@ksu.edu.sa (M.I.); alalmomen@ksu.edu.sa (A.A.A.)  
\* Correspondence: aalshamsan@ksu.edu.sa  
† These authors contributed equally to this work.

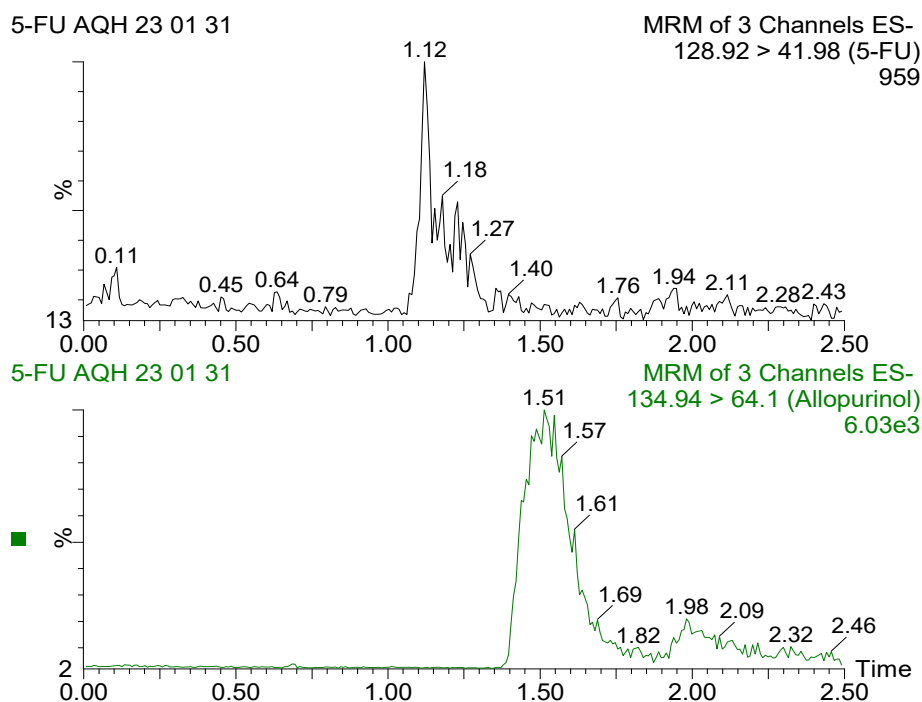

**Figure S1a.** Representative LLOQ chromatogram of 5-FU and IS in AqH in sample prepared by protein precipitation method.

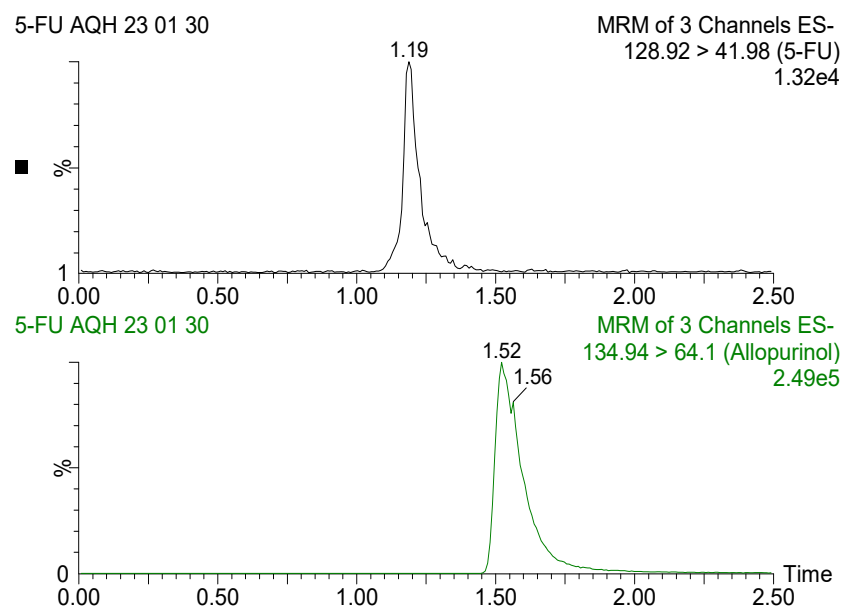

**Figure S1b.** Representative LLOQ chromatogram of 5-FU and IS in AqH in sample prepared by liquid-liquid extraction method.

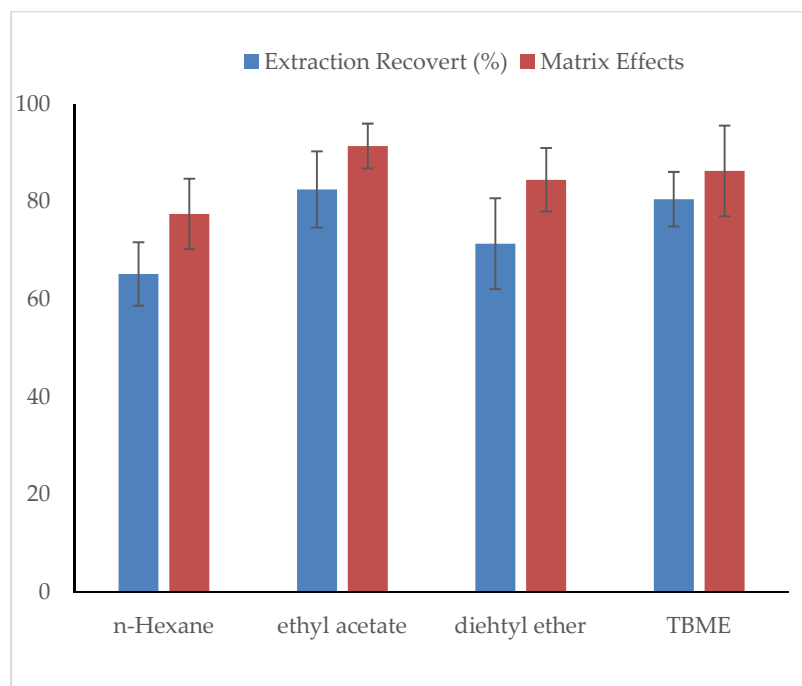

**Figure S2.** The comparative extraction recovery (%) and matrix effects (%) data of different extracting solvents obtained during sample preparation optimization.
